# Supplementary material
Source: ML conference proceedings conference paper supplement (https://openaccess.thecvf.com/content/CVPR2024/html/Wu_Point_Transformer_V3_CVPR_2024_paper.html)
Supplement: Supplementary file 1 [file Wu_Point_Transformer_V3_CVPR_2024_supplemental.pdf]

## Appendix

For a thorough understanding of our Point Transformer V3 (PTv3), we have compiled a detailed Appendix. The table of contents below offers a quick overview and will guide to specific sections of interest.

### Contents

|                                              |           |
|----------------------------------------------|-----------|
| <b>A. Limitations and Broader Impacts</b>    | <b>13</b> |
| <b>B. Implementation Details</b>             | <b>13</b> |
| B.1. Training Settings . . . . .             | 14        |
| B.2. Model Settings . . . . .                | 14        |
| B.3. Data Augmentations . . . . .            | 14        |
| <b>C. Additional Ablations</b>               | <b>15</b> |
| C.1. Normalization Layer . . . . .           | 15        |
| C.2. Block Structure . . . . .               | 15        |
| <b>D. Additional Comparison</b>              | <b>15</b> |
| D.1. Indoor Semantic Segmentation . . . . .  | 16        |
| D.2. Outdoor Semantic Segmentation . . . . . | 16        |

### A. Limitations and Broader Impacts

**Attention mechanism.** In prioritizing efficiency, PTv3 reverts to utilizing dot-product attention, which has been well-optimized through engineering efforts. However, we do note a reduction in convergence speed and a limitation in further scaling depth compared to vector attention. This issue also observed in recent advancements in transformer technology [93], is attributed to “attention sinks” stemming from the dot-product and softmax operations. Consequently, our findings reinforce the need for continued exploration of attention mechanisms.

**Scaling parameters.** PTv3 transcends the existing trade-offs between accuracy and efficiency, paving the way for investigating 3D transformers at larger parameter scales within given computational resources. While this exploration remains a topic for future work, current point cloud transformers already demonstrate an over-capacity for existing tasks. We advocate for a combined approach that scales up both the model parameters and the scope of data and tasks (e.g., learning from all available data, multi-task frameworks, and multi-modality tasks). Such an integrated strategy could fully unlock the potential of scaling in 3D representation learning.

**Multiple modalities.** Point cloud serialization provides a robust methodology for transforming n-dimensional data into a structured 1D format, effectively preserving spatial proximity. This technique can similarly be applied to image data, enabling its conversion into a language-style 1D structure that PTv3 can efficiently encode. This capability opens new avenues for the development of multimodal

| Scratch         |                                    | Joint Training [92] |                                           |
|-----------------|------------------------------------|---------------------|-------------------------------------------|
| Config          | Value                              | Config              | Value                                     |
| optimizer       | AdamW                              | optimizer           | AdamW                                     |
| scheduler       | Cosine                             | scheduler           | Cosine                                    |
| criteria        | CrossEntropy (1)<br>Lovasz [4] (1) | criteria            | CrossEntropy (1)<br>Lovasz [4] (1)        |
| learning rate   | 5e-3                               | learning rate       | 5e-3                                      |
| block lr scaler | 0.1                                | block lr scaler     | 0.1                                       |
| weight decay    | 5e-2                               | weight decay        | 5e-2                                      |
| batch size      | 12                                 | batch size          | 24                                        |
| datasets        | ScanNet /<br>S3DIS /<br>Struct.3D  | datasets            | ScanNet (2)<br>S3DIS (1)<br>Struct.3D (4) |
| warmup epochs   | 40                                 | warmup iters        | 6k                                        |
| epochs          | 800                                | iters               | 120k                                      |

Table 12. **Indoor semantic segmentation settings.**

| Scratch         |                                    | Joint Training [92] |                                            |
|-----------------|------------------------------------|---------------------|--------------------------------------------|
| Config          | Value                              | Config              | Value                                      |
| optimizer       | AdamW                              | optimizer           | AdamW                                      |
| scheduler       | Cosine                             | scheduler           | Cosine                                     |
| criteria        | CrossEntropy (1)<br>Lovasz [4] (1) | criteria            | CrossEntropy (1)<br>Lovasz [4] (1)         |
| learning rate   | 2e-3                               | learning rate       | 2e-3                                       |
| block lr scaler | 1e-1                               | block lr scaler     | 1e-1                                       |
| weight decay    | 5e-3                               | weight decay        | 5e-3                                       |
| batch size      | 12                                 | batch size          | 24                                         |
| datasets        | NuScenes /<br>Sem.KITTI /<br>Waymo | datasets            | NuScenes (1)<br>Sem.KITTI (1)<br>Waymo (1) |
| warmup epochs   | 2                                  | warmup iters        | 9k                                         |
| epochs          | 50                                 | iters               | 180k                                       |

Table 13. **Outdoor semantic segmentation settings.**

| Ins. Seg.       |                 | Obj. Det        |                   |
|-----------------|-----------------|-----------------|-------------------|
| Config          | Value           | Config          | Value             |
| framework       | PointGroup [35] | framework       | CenterPoint [102] |
| optimizer       | AdamW           | optimizer       | Adam              |
| scheduler       | Cosine          | scheduler       | Cosine            |
| learning rate   | 5e-3            | learning rate   | 3e-3              |
| block lr scaler | 1e-1            | block lr scaler | 1e-1              |
| weight decay    | 5e-2            | weight decay    | 1e-2              |
| batch size      | 12              | batch size      | 16                |
| datasets        | ScanNet         | datasets        | Waymo             |
| warmup epochs   | 40              | warmup epochs   | 0                 |
| epochs          | 800             | epochs          | 24                |

Table 14. **Other downstream tasks settings.**

models that bridge 2D and 3D spaces, fostering opportunities for large-scale, synergistic pre-training that integrates both image and point cloud data.

### B. Implementation Details

Our implementation primarily utilizes Pointcept [15], a specialized codebase focusing on point cloud perception and

| Config                | Value                                                 |
|-----------------------|-------------------------------------------------------|
| serialization pattern | Z + TZ + H + TH                                       |
| patch interaction     | Shift Order + Shuffle Order                           |
| positional encoding   | xCPE                                                  |
| embedding depth       | 2                                                     |
| embedding channels    | 32                                                    |
| encoder depth         | [2, 2, 6, 2]                                          |
| encoder channels      | [64, 128, 256, 512]                                   |
| encoder num heads     | [4, 8, 16, 32]                                        |
| encoder patch size    | [1024, 1024, 1024, 1024]                              |
| decoder depth         | [1, 1, 1, 1]                                          |
| decoder channels      | [64, 64, 128, 256]                                    |
| decoder num heads     | [4, 4, 8, 16]                                         |
| decoder patch size    | [1024, 1024, 1024, 1024]                              |
| down stride           | [ $\times 2$ , $\times 2$ , $\times 2$ , $\times 2$ ] |
| mlp ratio             | 4                                                     |
| qkv bias              | True                                                  |
| drop path             | 0.3                                                   |

Table 15. **Model settings.**

| Augmentations   | Parameters                                | Indoor | Outdoor |
|-----------------|-------------------------------------------|--------|---------|
| random dropout  | dropout ratio: 0.2, p: 0.2                | ✓      | -       |
| random rotate   | axis: z, angle: [-1, 1], p: 0.5           | ✓      | ✓       |
|                 | axis: x, angle: [-1 / 64, 1 / 64], p: 0.5 | ✓      | -       |
|                 | axis: y, angle: [-1 / 64, 1 / 64], p: 0.5 | ✓      | -       |
| random scale    | scale: [0.9, 1.1]                         | ✓      | ✓       |
| random flip     | p: 0.5                                    | ✓      | ✓       |
| random jitter   | sigma: 0.005, clip: 0.02                  | ✓      | ✓       |
| elastic distort | params: [[0.2, 0.4], [0.8, 1.6]]          | ✓      | -       |
| auto contrast   | p: 0.2                                    | ✓      | -       |
| color jitter    | std: 0.05; p: 0.95                        | ✓      | -       |
| grid sampling   | grid size: 0.02 (indoor), 0.05 (outdoor)  | ✓      | ✓       |
| sphere crop     | ratio: 0.8, max points: 128000            | ✓      | -       |
| normalize color | p: 1                                      | ✓      | -       |

Table 16. **Data augmentations.**

representation learning. For tasks involving outdoor object detection, we employ OpenPCDet [76], which is tailored for LiDAR-based 3D object detection. The specifics of our implementation are detailed in this section.

### B.1. Training Settings

**Indoor semantic segmentation.** The settings for indoor semantic segmentation are outlined in Tab. 12. The two leftmost columns describe the parameters for training from scratch using a single dataset. To our knowledge, this represents the first initiative to standardize training settings across different indoor benchmarks with a unified approach. The two rightmost columns describe the parameters for multi-dataset joint training [92] with PTV3, maintaining similar settings to the scratch training but with an increased batch size. The numbers in brackets indicate the relative weight assigned to each dataset (criteria) in the mix.

**Outdoor semantic segmentation.** The configuration for outdoor semantic segmentation, presented in Tab. 13, follows a similar format to that of indoor. We also standardize the training settings across three outdoor datasets. Notably,

| Block   | BN   | LN   | BN   | LN          |
|---------|------|------|------|-------------|
| Pooling | BN   | LN   | LN   | BN          |
| Perf.   | 76.7 | 76.1 | 75.6 | <b>77.3</b> |

Table 17. **Normalization layer.**

| Block | Traditional | Post-Norm | Pre-Norm    |
|-------|-------------|-----------|-------------|
| Perf. | 76.6        | 72.3      | <b>77.3</b> |

Table 18. **Block structure.**

PTv3 operates effectively without the need for point clipping within a specific range, a step that is typically essential in current models. Furthermore, we extend our methodology to multi-dataset joint training with PTV3, employing settings analogous to scratch training but with augmented batch size. The numbers in brackets represent the proportional weight assigned to each dataset in the training mix.

**Other Downstream Tasks.** We outline our configurations for indoor instance segmentation and outdoor object detection in Tab. 14. For indoor instance segmentation, we use PointGroup [35] as our foundational framework, a popular choice in 3D representation learning [30, 91, 92, 94]. Our configuration primarily follows PointContrast [94], with necessary adjustments made for PTV3 compatibility. Regarding outdoor object detection, we adhere to the settings detailed in FlatFormer [51] and implement CenterPoint as our base framework to assess PTV3’s effectiveness. It’s important to note that PTV3 is versatile and can be integrated with various other frameworks due to its backbone nature.

### B.2. Model Settings

As briefly described in Sec. 4.3, here we delve into the detailed model configurations of our PTV3, which are comprehensively listed in Tab. 15. This table serves as a blueprint for components within serialization-based point cloud transformers, encapsulating models like OctFormer [83] and FlatFormer [51] within the outlined frameworks, except for certain limitations discussed in Sec. 2. Specifically, OctFormer can be interpreted as utilizing a single z-order serialization with patch interaction enabled by Shift Dilation. Conversely, FlatFormer can be characterized by its window-based serialization approach, facilitating patch interaction through Shift Order.

### B.3. Data Augmentations

The specific configurations of data augmentations implemented for PTV3 are detailed in Tab. 16. We unify augmentation pipelines for both indoor and outdoor scenarios separately, and the configurations are shared by all tasks within each domain. Notably, we observed that PTV3 does not depend on point clipping within a specific range, a process often crucial for existing models.

| Methods                      | Year | Val         | Test        |
|------------------------------|------|-------------|-------------|
| ◦ PointNet++ [63]            | 2017 | 53.5        | 55.7        |
| ◦ 3DMV [16]                  | 2018 | -           | 48.4        |
| ◦ PointCNN [46]              | 2018 | -           | 45.8        |
| ◦ SparseConvNet [25]         | 2018 | 69.3        | 72.5        |
| ◦ PanopticFusion [55]        | 2019 | -           | 52.9        |
| ◦ PointConv [88]             | 2019 | 61.0        | 66.6        |
| ◦ JointPointBased [11]       | 2019 | 69.2        | 63.4        |
| ◦ KPConv [77]                | 2019 | 69.2        | 68.6        |
| ◦ PointASNL [97]             | 2020 | 63.5        | 66.6        |
| ◦ SegGCN [44]                | 2020 | -           | 58.9        |
| ◦ RandLA-Net [32]            | 2020 | -           | 64.5        |
| ◦ JSENet [33]                | 2020 | -           | 69.9        |
| ◦ FusionNet [104]            | 2020 | -           | 68.8        |
| ◦ FastPointTransformer [58]  | 2022 | 72.4        | -           |
| ◦ StratifiedTransformer [40] | 2022 | 74.3        | 73.7        |
| ◦ PointNeXt [64]             | 2022 | 71.5        | 71.2        |
| ◦ LargeKernel3D [9]          | 2023 | 73.5        | 73.9        |
| ◦ PointMetaBase [47]         | 2023 | 72.8        | 71.4        |
| ◦ PointConvFormer [89]       | 2023 | 74.5        | 74.9        |
| ◦ OctFormer [83]             | 2023 | 75.7        | 76.6        |
| ◦ Swin3D [101]               | 2023 | 77.5        | 77.9        |
| ● + Supervised [101]         | 2023 | 76.7        | 77.9        |
| ◦ MinkUNet [13]              | 2019 | 72.2        | 73.6        |
| ● + PC [94]                  | 2020 | 74.1        | -           |
| ● + CSC [30]                 | 2021 | 73.8        | -           |
| ● + MSC [91]                 | 2023 | 75.5        | -           |
| ● + GC [81]                  | 2024 | 75.7        | -           |
| ● + PPT [92]                 | 2024 | 76.4        | 76.6        |
| ◦ OA-CNNs [60]               | 2024 | 76.1        | 75.6        |
| ◦ PTv1 [106]                 | 2021 | 70.6        | -           |
| ◦ PTv2 [90]                  | 2022 | 75.4        | 74.2        |
| ◦ PTv3 (Ours)                | 2024 | 77.5        | 77.9        |
| ● + PPT [92]                 | 2024 | <b>78.6</b> | <b>79.4</b> |

Table 19. ScanNet V2 semantic segmentation.

## C. Additional Ablations

In this section, we present further ablation studies focusing on macro designs of PTv3, previously discussed in Sec. 4.3.

### C.1. Normalization Layer

Previous point transformers employ Batch Normalization (BN), which can lead to performance variability depending on the batch size. This variability becomes particularly problematic in scenarios with memory constraints that require small batch sizes or in tasks demanding dynamic or varying batch sizes. To address this issue, we have gradually transitioned to Layer Normalization (LN). Our final, empirically determined choice is to implement Layer Normalization in the attention blocks while retaining Batch Normalization in the pooling layers (see Tab. 17).

### C.2. Block Structure

Previous point transformers use a traditional block structure that sequentially applies an operator, a normalization layer, and an activation function. While effective, this approach can sometimes complicate training deeper models due to is-

| Methods                      | Year | Area5       | 6-fold      |
|------------------------------|------|-------------|-------------|
| ◦ PointNet [62]              | 2017 | 41.1        | 47.6        |
| ◦ SegCloud [75]              | 2017 | 48.9        | -           |
| ◦ TanConv [74]               | 2018 | 52.6        | -           |
| ◦ PointCNN [46]              | 2018 | 57.3        | 65.4        |
| ◦ ParamConv [85]             | 2018 | 58.3        | -           |
| ◦ PointWeb [105]             | 2019 | 60.3        | 66.7        |
| ◦ HPEIN [34]                 | 2019 | 61.9        | -           |
| ◦ KPConv [77]                | 2019 | 67.1        | 70.6        |
| ◦ GACNet [82]                | 2019 | 62.9        | -           |
| ◦ PAT [100]                  | 2019 | 60.1        | -           |
| ◦ SPGraph [42]               | 2018 | 58.0        | 62.1        |
| ◦ SegGCN [44]                | 2020 | 63.6        | -           |
| ◦ PACConv [96]               | 2021 | 66.6        | -           |
| ◦ StratifiedTransformer [40] | 2022 | 72.0        | -           |
| ◦ PointNeXt [64]             | 2022 | 70.5        | 74.9        |
| ◦ SuperpointTransformer [65] | 2023 | 68.9        | 76.0        |
| ◦ PointMetaBase [47]         | 2023 | 72.0        | 77.0        |
| ◦ Swin3D [101]               | 2023 | 72.5        | 76.9        |
| ● + Supervised [101]         | 2023 | 74.5        | 79.8        |
| ◦ MinkUNet [13]              | 2019 | 65.4        | 65.4        |
| ● + PC [94]                  | 2020 | 70.3        | -           |
| ● + CSC [30]                 | 2021 | 72.2        | -           |
| ● + MSC [91]                 | 2023 | 70.1        | -           |
| ● + GC [81]                  | 2024 | 72.0        | -           |
| ● + PPT [92]                 | 2024 | 72.7        | 78.1        |
| ◦ PTv1 [106]                 | 2021 | 70.4        | 65.4        |
| ◦ PTv2 [90]                  | 2022 | 71.6        | 73.5        |
| ◦ PTv3 (Ours)                | 2024 | 73.4        | 77.7        |
| ● + PPT [92]                 | 2024 | <b>74.7</b> | <b>80.8</b> |

Table 20. S3DIS semantic segmentation.

sues like vanishing gradients or the need for careful initialization and learning rate adjustments [95]. Consequently, we explored adopting a more modern block structure, such as pre-norm and post-norm. The pre-norm structure, where a normalization layer precedes the operator, can stabilize training by ensuring normalized inputs for each layer [12]. In contrast, the post-norm structure places a normalization layer right after the operator, potentially leading to faster convergence but with less stability [80]. Our experimental results (see Tab. 18) indicate that the pre-norm structure is more suitable for our PTv3, aligning with findings in recent transformer-based models [95].

## D. Additional Comparison

In this section, we expand upon the combined results table for semantic segmentation (Tab. 5 and Tab. 7) from our main paper, offering a more detailed breakdown of results alongside the respective publication years of previous works. This comprehensive result table is designed to assist readers in tracking the progression of research efforts in 3D representation learning. Marker ◦ refers to the result from a model trained from scratch, and ● refers to the result from a pre-trained model.

| Methods             | Year | Val         | Test        |
|---------------------|------|-------------|-------------|
| ○ SPVNAS [73]       | 2020 | 64.7        | 66.4        |
| ○ Cylinder3D [108]  | 2021 | 64.3        | 67.8        |
| ○ PVKD [31]         | 2022 | -           | 71.2        |
| ○ 2DPASS [98]       | 2022 | 69.3        | 72.9        |
| ○ WaffleIron [61]   | 2023 | 68.0        | 70.8        |
| ○ SphereFormer [41] | 2023 | 67.8        | 74.8        |
| ○ RangeFormer [39]  | 2023 | 67.6        | 73.3        |
| ○ MinkUNet [13]     | 2019 | 63.8        | -           |
| ● + PPT [92]        | 2024 | 71.4        | -           |
| ○ OA-CNNs [60]      | 2024 | 70.6        | -           |
| ○ PTv2 [90]         | 2022 | 70.3        | 72.6        |
| ○ PTv3 (Ours)       | 2024 | 70.8        | 74.2        |
| ● + M3Net [48]      | 2024 | 72.0        | 75.1        |
| ● + PPT [92]        | 2024 | <b>72.3</b> | <b>75.5</b> |

Table 21. SemanticKITTI semantic segmentation.

| Methods             | Year | Val         | Test        |
|---------------------|------|-------------|-------------|
| ○ SPVNAS [73]       | 2020 | 77.4        | -           |
| ○ Cylinder3D [108]  | 2021 | 76.1        | 77.2        |
| ○ PVKD [31]         | 2022 | -           | 76.0        |
| ○ 2DPASS [98]       | 2022 | -           | 80.8        |
| ○ SphereFormer [41] | 2023 | 78.4        | 81.9        |
| ○ RangeFormer [39]  | 2023 | 78.1        | 80.1        |
| ○ MinkUNet [13]     | 2019 | 73.3        | -           |
| ● + PPT [92]        | 2024 | 78.6        | -           |
| ○ OA-CNNs [60]      | 2024 | 78.9        | -           |
| ○ PTv2 [90]         | 2022 | 80.2        | 82.6        |
| ○ PTv3 (Ours)       | 2024 | 80.4        | 82.7        |
| ● + M3Net [48]      | 2024 | 80.9        | <b>83.1</b> |
| ● + PPT [92]        | 2024 | <b>81.2</b> | 83.0        |

Table 22. NuScenes semantic segmentation.

## D.1. Indoor Semantic Segmentation

We conduct a detailed comparison of pre-training technologies and backbones on the ScanNet v2 [17] (see Tab. 19) and S3DIS [2] (see Tab. 20) datasets. ScanNet v2 comprises 1,513 room scans reconstructed from RGB-D frames, divided into 1,201 training scenes and 312 for validation. In this dataset, model input point clouds are sampled from the vertices of reconstructed meshes, with each point assigned a semantic label from 20 categories (e.g., wall, floor, table). The S3DIS dataset for semantic scene parsing includes 271 rooms across six areas from three buildings. Following a common practice [63, 75, 106], we withhold area 5 for testing and perform a 6-fold cross-validation. Different from ScanNet v2, S3DIS densely sampled points on mesh surfaces, annotated into 13 categories. Consistent with standard practice [63]. We employ the mean class-wise intersection over union (mIoU) as the primary evaluation metric for indoor semantic segmentation.

## D.2. Outdoor Semantic Segmentation

We extend our comprehensive evaluation of pre-training technologies and backbones to outdoor semantic segmentation tasks, focusing on the SemanticKITTI [3](see Tab. 21)

and NuScenes [5] (see Tab. 22) datasets. SemanticKITTI is derived from the KITTI Vision Benchmark Suite and consists of 22 sequences, with 19 for training and the remaining 3 for testing. It features richly annotated LiDAR scans, offering a diverse array of driving scenarios. Each point in this dataset is labeled with one of 28 semantic classes, encompassing various elements of urban driving environments. NuScenes, on the other hand, provides a large-scale dataset for autonomous driving, comprising 1,000 diverse urban driving scenes from Boston and Singapore. For outdoor semantic segmentation, we also employ the mean class-wise intersection over union (mIoU) as the primary evaluation metric for outdoor semantic segmentation.
